# Supplementary material
Source: publisher site journal article supplement (https://www.dovepress.com/article/357812)
Supplement: Supplementary file 1 [file get_supplementary_file.php]

**SUPPLEMENTS TO THE RESEARCH PROTOCOL**

**Multicomponent prehabilitation as a novel strategy for preventing delirium in older chronic limb threatening ischemia patients: a study protocol**

# Supplemental Table 1: Prehabilitation - PAD -protocol

| **Screening Physical therapist: peripheral arterial disease guideline** | | | |
| --- | --- | --- | --- |
| **Item** | **Cut-off point** | **Action** | **Measuring moment** |
| Max Inspiratory & Expiratory Pressure Measurement (MIP – MEP)  Inspiratory muscle strength measure, a non-invasive method to objectify inspiratory muscle strength | Normal values cm H2O:   | **Age** | **Male** | | **Female** | | --- | --- | --- | --- | | 50-69 y | -112±20 | | -77±18 | | 70 y | -76±27 | | -66±18 | |  | | | | | Outcome 1 | |  | | | Outcome 2 | |  | | | Outcome 3 | |  | | | Mean | |  | | | Within normal range | | Yes/no | | | Threshold setting:  Initial value: 30% of average  Start time: 15-30 minutes; otherwise 2 x 5 minutes building up to 15 minutes | Outpatient clinic |
|  |  |  |  |
| Hand grip strength Jamar  The maximum grip strength of the hand gives a good estimate of peripheral muscle function and is related to the total amount of muscle mass in the body | |  | | | | --- | --- | --- | |  | Non-dominant hand (kg) | Dominant hand (kg) | | Test 1 |  |  | | Test 2 |  |  | | Test 3 |  |  | | Best score |  |  |   Interpretation   | **Age (years)** | **Female (kg)** | **Male (kg)** | | --- | --- | --- | | 15 | 28 | 42 | | 20 | 29 | 43 | | 25 | 30 | 44 | | 30 | 30 | 45 | | 35 | 30 | 45 | | 40 | 30 | 45 | | 45 | 30 | 45 | | 50 | 29 | 45 | | 55 | 28 | 44 | | 60 | 27 | 43 | | 65 | 25 | 41 | | 70 | 23 | 39 | | 75 | 20 | 37 | | 80 | 18 | 35 | | 85 | 15 | 32 | | 90 | 11 | 29 | | 95 | 8 | 26 | |  | Outpatient clinic |
| Timed Up en Go  Examines/evaluates getting out of the chair, walking 3 meters at a comfortable pace, turning, walking back and sitting down | Interpretation:  Normal < 10 sec  Vulnerable Elder: 11-20 sec  Requires further evaluation: > 20 sec  >14 sec 🡪 consultation to geriatrician   |  | Test 1 | Test 2 | Test 3 | Mean | | --- | --- | --- | --- | --- | | Score sec. |  |  |  |  | | Consultation to geriatrician | Outpatient clinic |
| Timed Chair-Stand test  Explores/evaluates lower extremity muscle strength and endurance | 5x get up from chair with arms crossed in front of the chest  >14 sec: indication of increased risk of falling  Parkinson's > 16 sec  Stroke > 12 sec  Balance and vestibular disorder > 14.2 | Consultation to geriatrician | Outpatient clinic |
| 10 meter walking test  Says something about physical ability to walk, walking speed and endurance | Walking speed >0.58m/sec (17.2 sec over 10 m): independent functioning indoors is likely  Walking speed >0.77m/sec (13 sec over 10 m): minimum speed to cross a street |  | Outpatient clinic |
| De Morton Mobility Index (DEMMI)  15 items Observation to be performed per item or activity is performed independently (score 0, 1 or 2). | A high DEMMI score corresponds to a high degree of mobility. |  | Outpatient clinic |

# Supplemental Figure 1: Flowchart physical therapy

*Comorbidities*

*Lifestyle advice*

*Maintaining/improving endurance and muscle strength*

*Maintain sputum mobilization through lung clearing and improve respiratory muscles.*

*Improve functional activity; transfers in and around the bed.*

*Functional activities and ADL: basic ADL exercises and possible adjustments aimed at dressing, washing and toileting: attention to safe functioning.*

*Lifestyle advice*

*Maintaining/improving endurance and muscle strength*

*Maintain sputum mobilization through lung clearing and improve respiratory muscles.*

*Maintain or improve walking distance. If walking is too hard; other forms of mobilisation such as cycling.*

*Maintain overall muscle strength.*

*Lifestyle advice*

*Maintaining/improving endurance and muscle strength*

*Maintain or extend walking distance*

*Familiar with breathing exercises and possibly sputum mobilization*

*Intervention target group 1*

*Intervention target group 2*

*Intervention target group 3*

*No*

*Yes*

*Limited in ADL and/or walking distance*

*No*

*Yes*
